# Supplementary material for: A proof-of-concept study of the secondary structure of influenza A, B M2 and MERS- and SARS-CoV E transmembrane peptides using folding molecular dynamics simulations in a membrane mimetic solvent
Source: Royal Society of Chemistry journal article supplement (doi:10.1039/d2cp02881f), 2022-01-01
Supplement: d2cp02881f1.pdf [file d2cp02881f1.pdf]

## Supplementary Information

### RMSD from reference structure

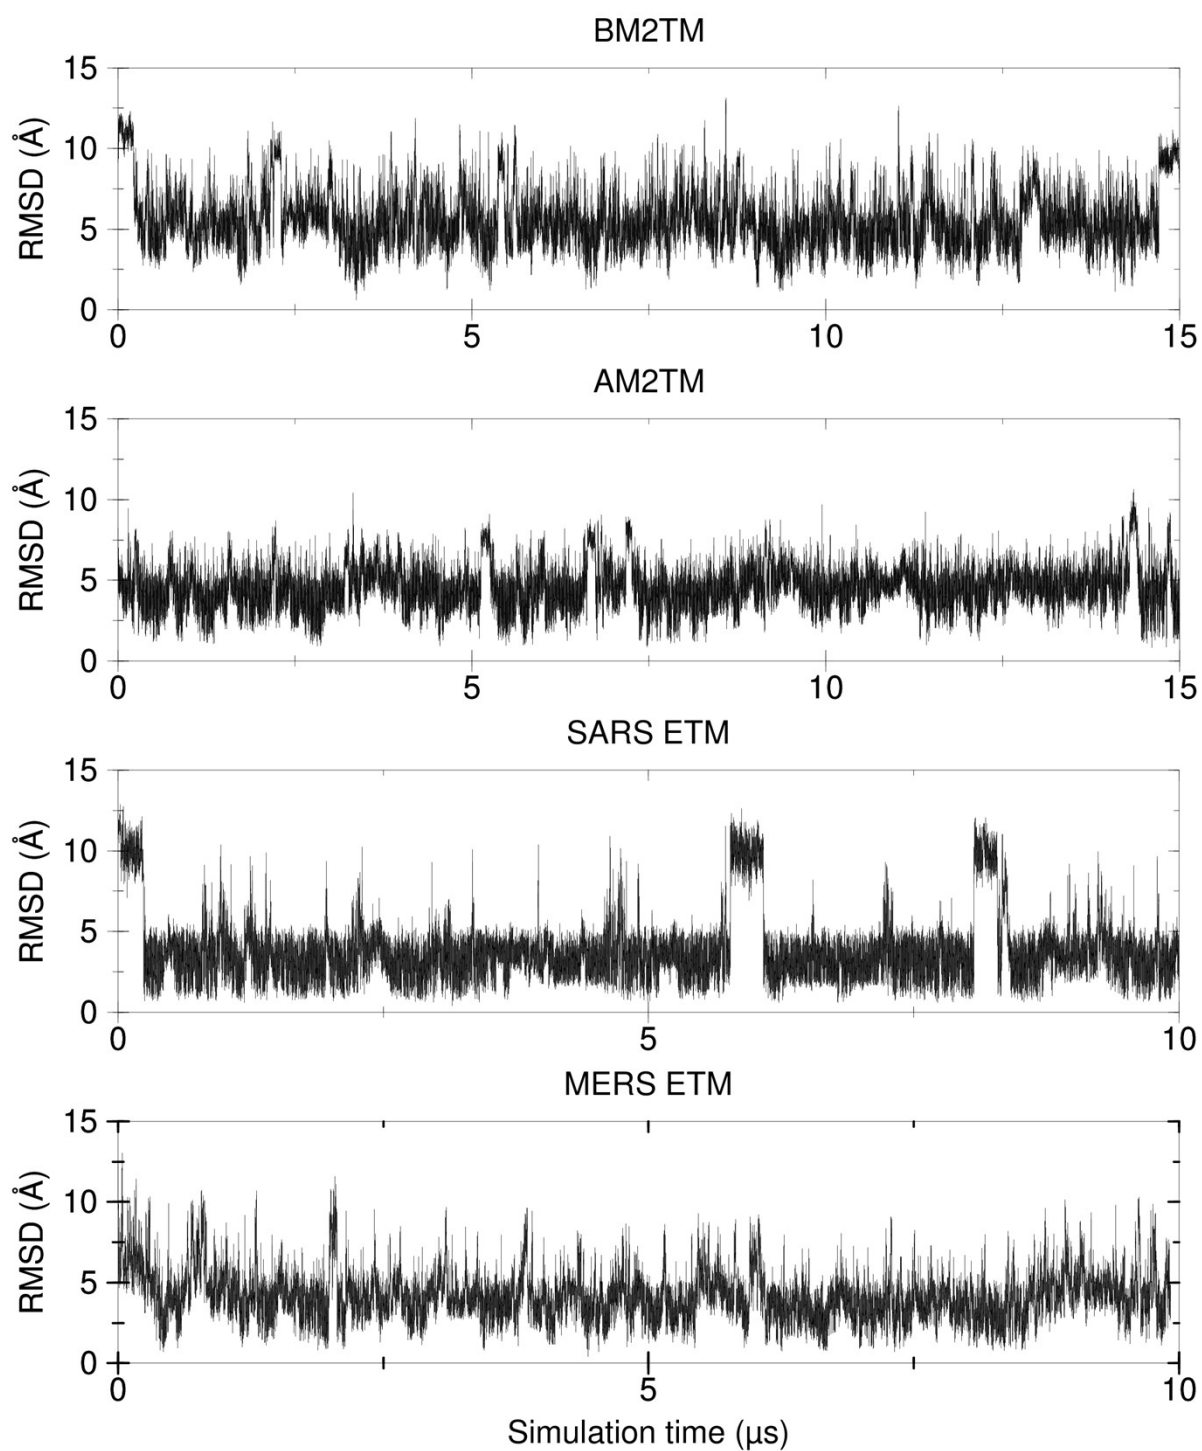

Figure S1. RMSD (Ca carbons) of peptides tested for the 10 μs or 15 μs of folding dynamics.

## Distribution of RMSDs

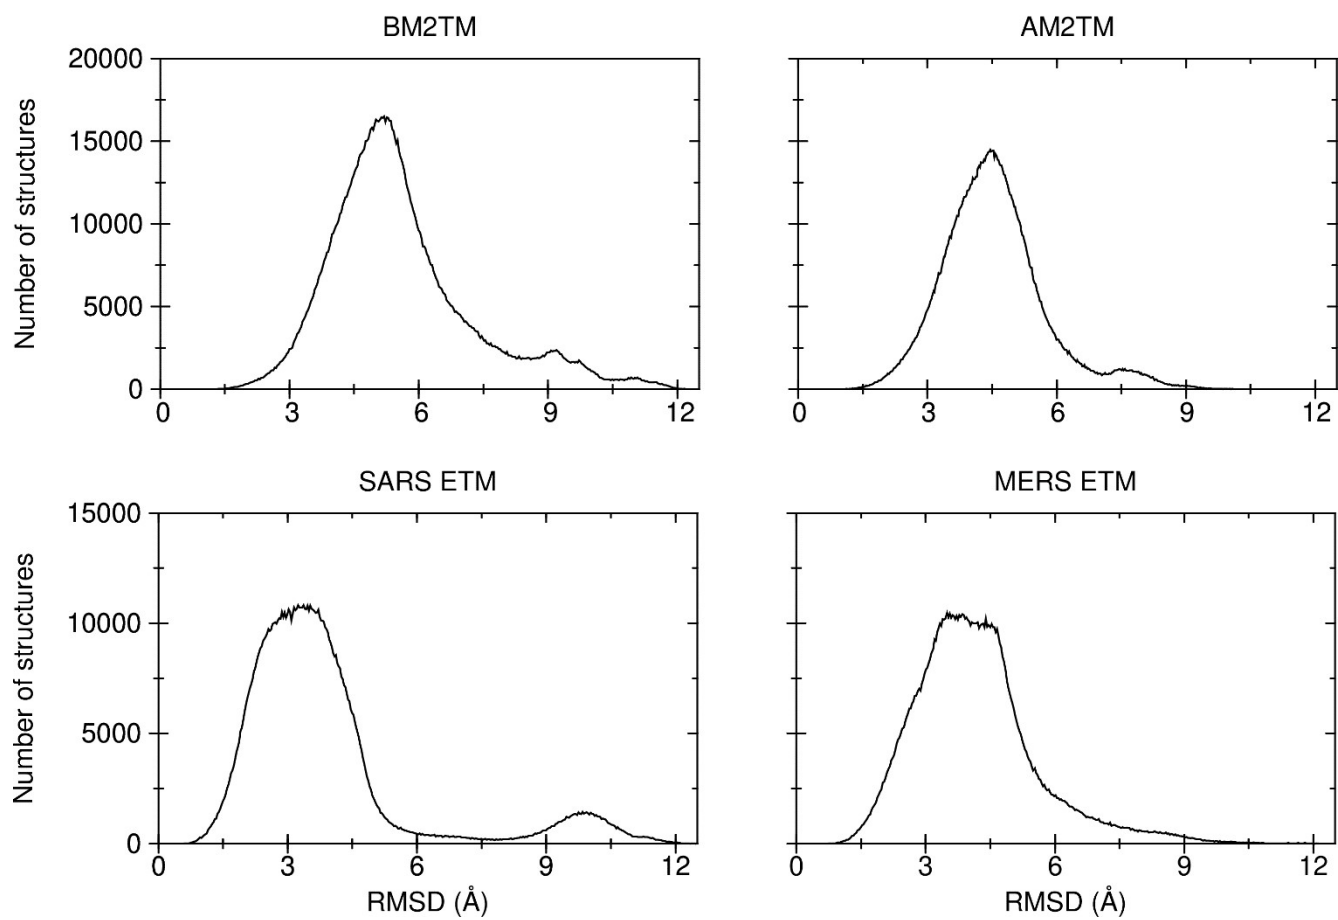

Figure S2. Distribution of the RMSD (Ca carbons) in the calculated snapshots of the peptides tested with folding dynamics.
